# Supplementary material for: Specific and sensitive imaging of basal cysteine over homocysteine in living cells
Source: Royal Society of Chemistry journal article supplement (doi:10.1039/c8ra05908j), 2018-01-01
Supplement: c8ra05908j1.pdf [file c8ra05908j1.pdf]

# **Supporting Information for**

## **Specific and Sensitive Imaging of Basal Cysteine over Homocysteine**

### **in Living Cells**

Longxue Nie<sup>a</sup>, Bingpeng Guo<sup>a</sup>, Congcong Gao<sup>a</sup>, Shaowen Zhang<sup>a\*</sup>, Jing Jing<sup>a\*</sup> and Xiaoling  
Zhang<sup>a\*</sup>

<sup>a</sup>Key Laboratory of Cluster Science of Ministry of Education, Beijing Key Laboratory of Photo-electronic/Electro- photonic Conversion Materials, School of Chemistry and Chemical Engineering, Beijing Institute of Technology, Beijing 100081, P. R. China.

E-mail: zhangxl@bit.edu.cn, hellojane@bit.edu.cn, swzhang@bit.edu.cn

## 1.The kinetic profile of the recognition of probe 1 for Cys

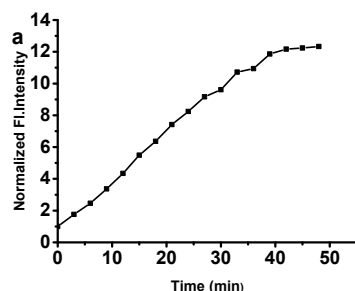

**Fig.S1.**The dynamic fluorescence changes at 525 nm of **probe 1** (5  $\mu$ M) after the addition of either Cys in  $\text{H}_2\text{O}$ :ethanol=8:2 (v/v), pH=7.4, 10 mM PBS at room temperature. Excitation wavelength is 400 nm, excitation and emission slit widths are 5 nm and 5 nm.

## 2. The fluorescence responses of probe 1 with other ions

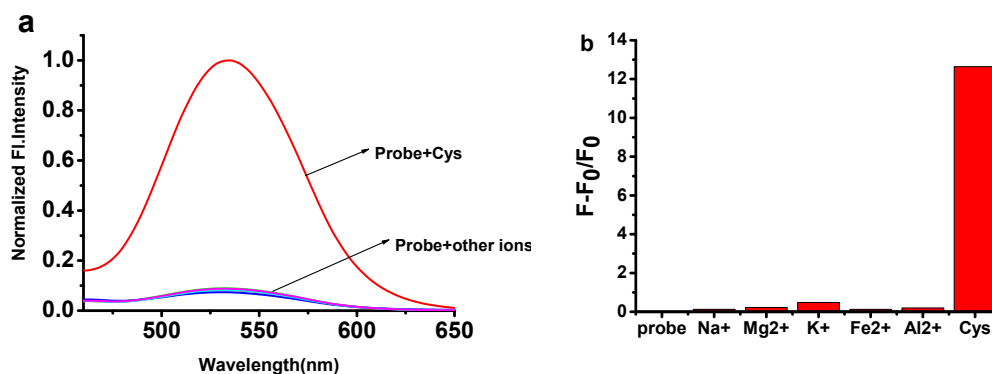

**Fig.S2.** The fluorescence spectra of **probe 1** (5  $\mu$ M) toward Cys (10  $\mu$ M) and various ions (10  $\mu$ M) in  $\text{H}_2\text{O}$ :ethanol=8:2 (v/v), pH=7.4, 10 mM PBS at room temperature. (b) Fluorescence intensity changes at 525 nm. Excitation wavelength = 400 nm, excitation and emission slit widths = 5 nm and 5 nm. Each spectrum was acquired 40 min after various analytes addition at room temperature.

## 3. Bioimaging applications

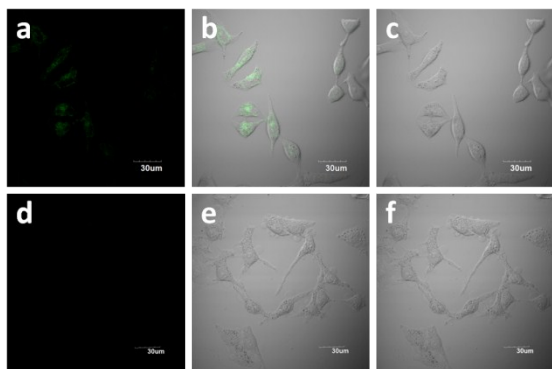

**Fig.S3.** Fluorescence images of Cys in living cells. (a-c) HepG2 cells stained with **probe 1** (5  $\mu$ M) for 30 min. (d-f) HepG2 cells were treated with NEM (100 ng/mL) for 1 h before incubated with **probe 1** (5  $\mu$ M) for 30 min. (a, d) fluorescence image. (b, e) Bright field image. (c, f) merged image. Incubation was performed at 37  $^{\circ}$ C under a humidified atmosphere containing 5% CO<sub>2</sub>. Excitation wavelength is 405 nm, emission wavelength was collected from 450 to 550nm.

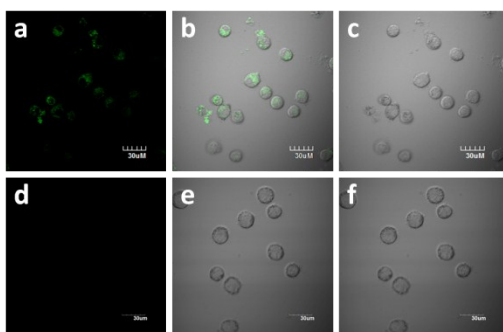

**Fig.S4.** Fluorescence images of Cys in living cells. (a-c) RAW 264.7 macrophage cells stained with **probe 1** (5  $\mu$ M) for 30 min. (d-f) RAW 264.7 macrophage cells were treated with NEM (100 ng/mL) for 1 h before incubated with **probe 1** (5  $\mu$ M) for 30 min. (a, d) fluorescence image. (b, e) Bright field image. (c, f) merged image. Incubation was performed at 37  $^{\circ}$ C under a humidified atmosphere containing 5% CO<sub>2</sub>. Excitation wavelength is 405 nm, emission wavelength was collected from 450 to 550nm.

### 3. The characterization data of probe 1

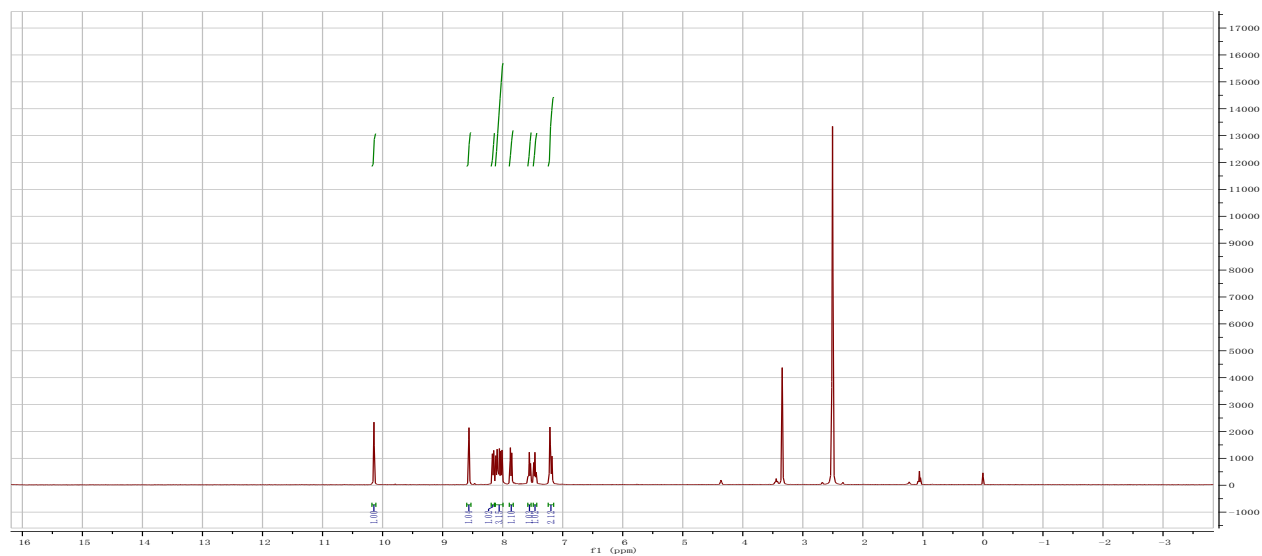

**Figure S5. <sup>1</sup>H NMR spectrum of compound P-OH.**

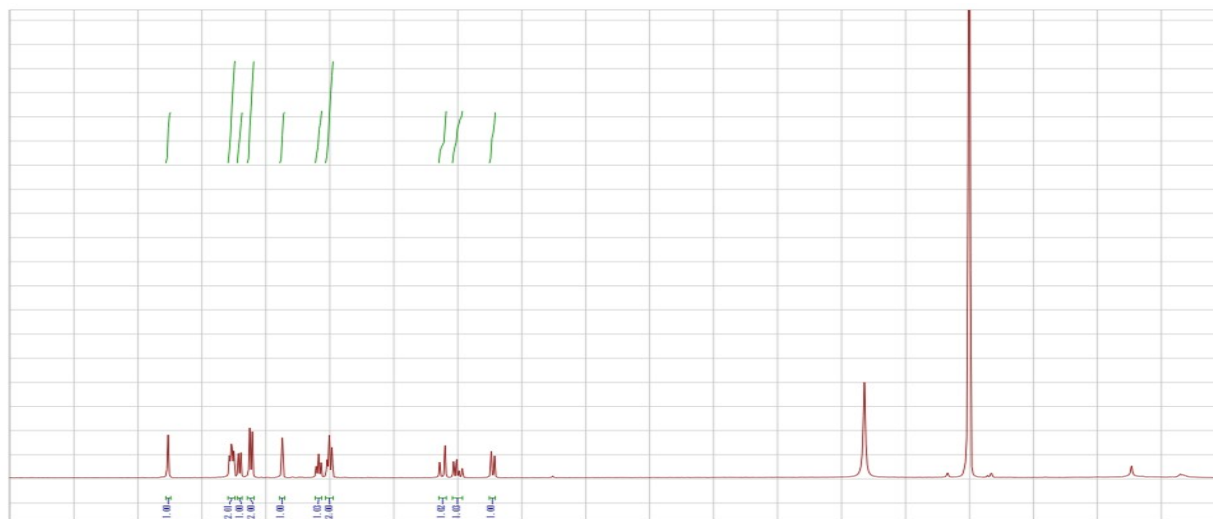

**Figure S6. <sup>1</sup>H NMR spectrum of probe 1.**

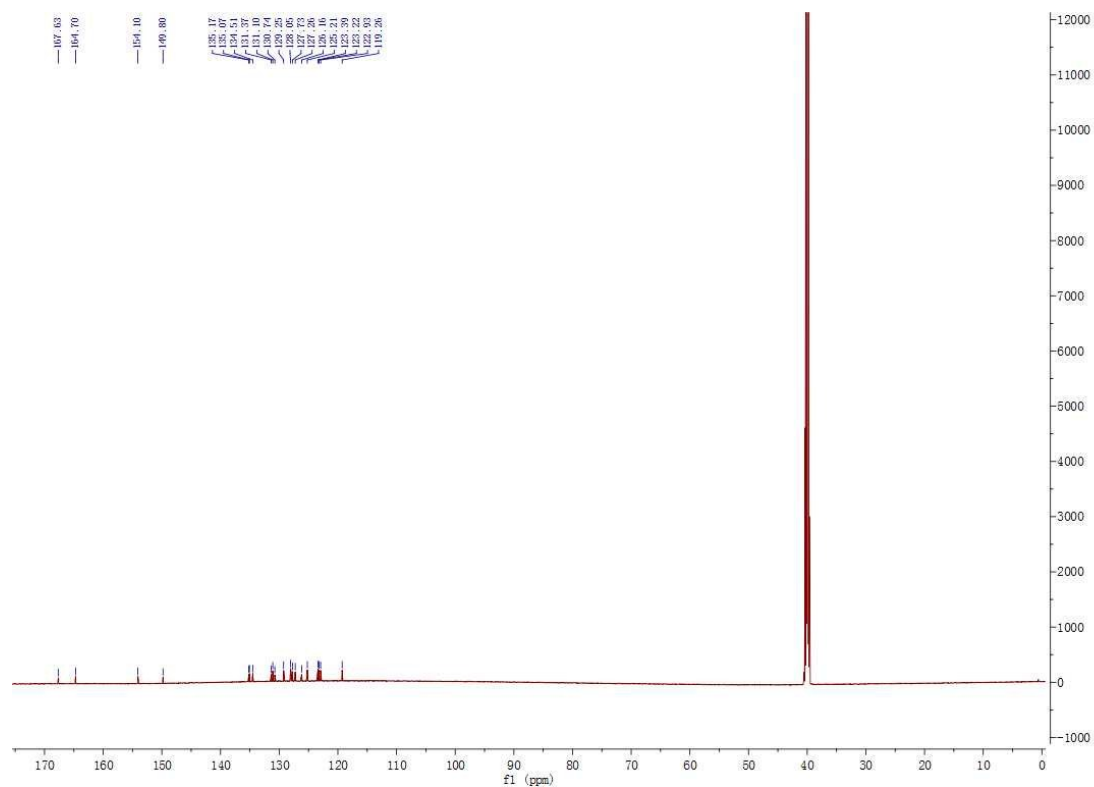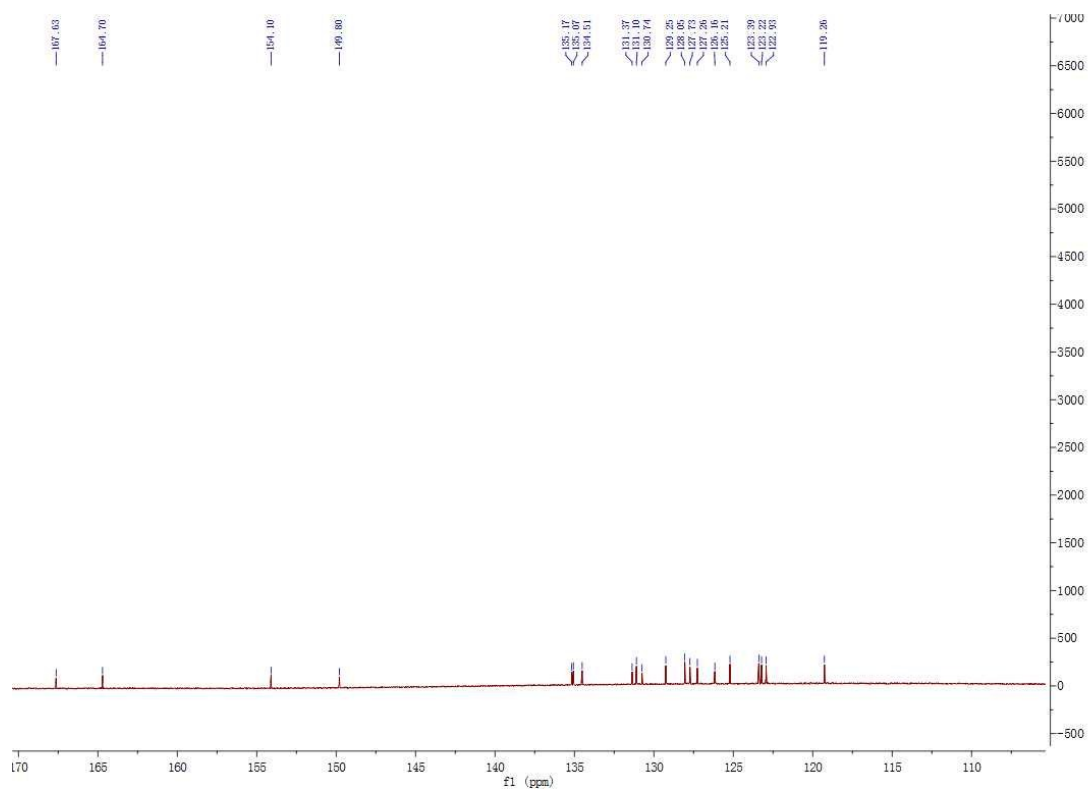

Figure S7.13C NMR spectrum of probe 1.

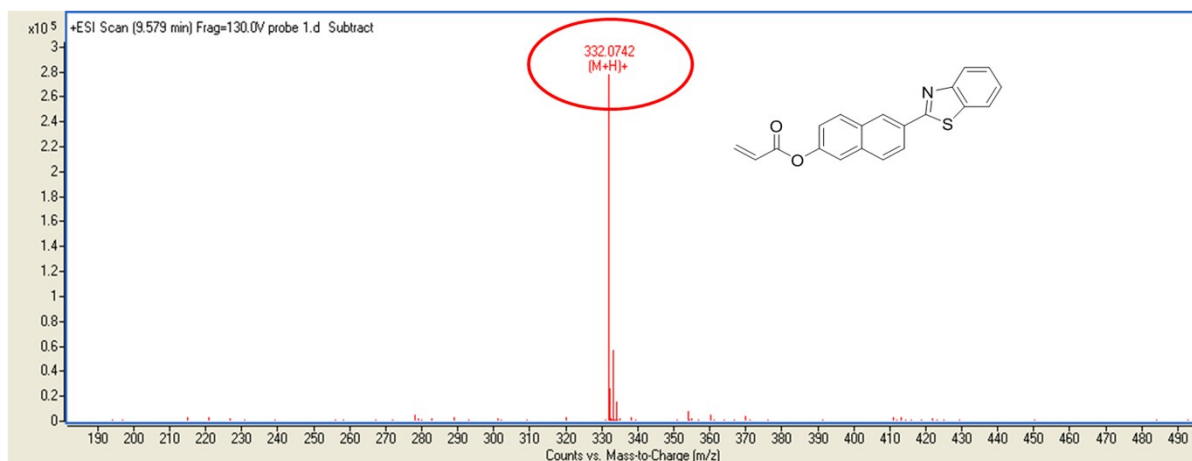

**Figure S8. HRMS of probe 1.**

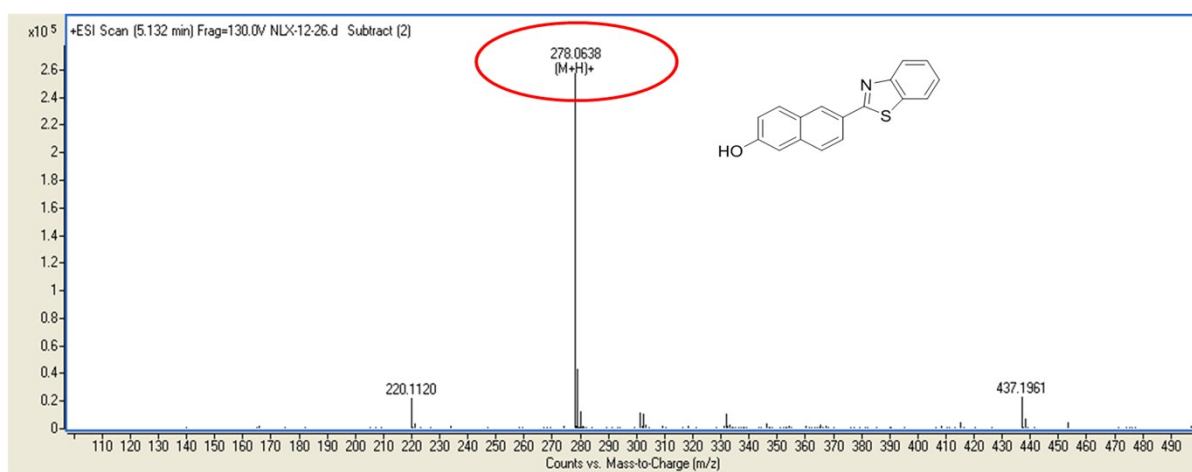

**Figure S9. HRMS of probe 1 reacted with Cys.**

**Table S1.** Comparison of fluorescent probes based on cyclization reaction for Cys

| probe                                                                             | $\lambda_{em}$<br>(nm) | Detection<br>limit | solution             | Selectivity<br>of probe | Synthesis<br>of probe | References                      |
|-----------------------------------------------------------------------------------|------------------------|--------------------|----------------------|-------------------------|-----------------------|---------------------------------|
| 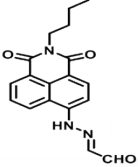 | 524                    | —                  | DMSO                 | Cys/Hcy                 | 2 Steps               | Org. Lett., 2012,520.           |
| 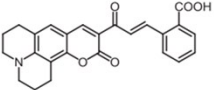 | 513                    | —                  | 100%H <sub>2</sub> O | Cys/Hcy                 | 2 Steps               | Biomaterials, 2012,8495.        |
| 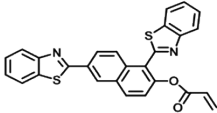 | 530                    | 0.05 $\mu$ M       | 50%THF               | Only Cys                | 3 Steps               | Tetrahedron letters, 2017,3214. |
| 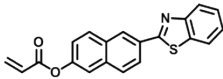 | 525                    | 14.8 nM            | 80%H <sub>2</sub> O  | Only Cys                | 2 Steps               | This work                       |
